# Supplementary material for: Biosynthesis of a new skyllamycin in Streptomyces nodosus: a cytochrome P450 forms an epoxide in the cinnamoyl chain
Source: Royal Society of Chemistry journal article supplement (doi:10.1039/d4ob00178h), 2024-01-01
Supplement: d4ob00178h1.pdf [file d4ob00178h1.pdf]

## Supporting information

Biosynthesis of a new skyllamycin analogue in *Streptomyces nodosus*: a cytochrome P450 forms an epoxide in the cinnamoyl chain

Yuhao Song,<sup>a</sup> Jose A. Amaya,<sup>b</sup> Vidhi C. Murarka,<sup>b</sup> Hugo Mendez,<sup>b</sup> Mark Hogan,<sup>a</sup> Jimmy Muldoon,<sup>c</sup> Paul Evans,<sup>c</sup> Yannick Ortin,<sup>c</sup> Steven L. Kelly,<sup>d</sup> David C. Lamb,<sup>d</sup> Thomas L. Poulos,<sup>b</sup> Patrick Caffrey<sup>\*a</sup>

<sup>a</sup>Centre for Synthesis and Chemical Biology and School of Biomolecular and Biomedical Science, University College Dublin, Ireland

<sup>b</sup>Departments of Molecular Biology and Biochemistry, Pharmaceutical Sciences and Chemistry, University of California, Irvine, California, USA

<sup>c</sup>Centre for Synthesis and Chemical Biology and School of Chemistry, University College Dublin, Ireland

<sup>d</sup>Faculty of Medicine, Health and Life Science, Institute of Life Science, Swansea University, Singleton Park, Swansea, SA2 8PP, UK

### Index

Table S1. Biological activities of cinnamate-containing non-ribosomal peptide natural products.

Table S2. Orphan P450s with > 85% sequence identity to P450Sky2.

Table S3. Comparison between NMR spectral data for synthetic skyllamycin A and isolated oxy-skyllamycin A.

Table S4 P450Sky2 crystallographic data collection and refinement statistics

Fig. S1. Overview of propenyl-cinnamoyl-ACP formation in the skyllamycin A producer, *Streptomyces* sp. Acta 2897

Fig. S2. Intermediates synthesized by the skyllamycin A NRPS.

Fig. S3. Structures of skyllamycins A to E

Fig. S4. Organization of propenyl-cinnamoyl biosynthetic genes in different skyllamycin BGCs.

Fig. S5. MS-MS mass spectrometry of skyllamycin A fragment generated by ammonia cleavage of the intact cyclodepsipeptide.

Fig. S6. MS-MS mass spectrometry of oxy-skyllamycin fragment generated by ammonia cleavage of the intact cyclodepsipeptide.

Fig. S7.  $^1\text{H-NMR}$  spectrum of oxy-skyllamycin (500 MHz,  $\text{CD}_3\text{OD}$ , 25 °C).

Fig. S8. Expansion 1 (5.7 to 8.4 ppm region) of the  $^1\text{H-NMR}$  spectrum of oxy-skyllamycin (500 MHz,  $\text{CD}_3\text{OD}$ , 25 °C). The cinnamoyl  $\beta\text{-CH}$  is in the box.

Fig. S9. Expansion 2 (2.6 to 6.0 ppm region) of the  $^1\text{H-NMR}$  spectrum of oxy-skyllamycin (500 MHz,  $\text{CD}_3\text{OD}$ , 25 °C).

Fig. S10. Expansion 3 (0.3 to 2.4 ppm region) of the  $^1\text{H-NMR}$  spectrum of oxy-skyllamycin (500 MHz,  $\text{CD}_3\text{OD}$ , 25 °C).

Fig. S11.  $^1\text{H-}^1\text{H-gCOSY}$  NMR spectrum for oxy-skyllamycin (500 MHz,  $\text{CD}_3\text{OD}$ , 25 °C).

Fig. S12. Expansion 1 (6.4 to 8.0 ppm region) of  $^1\text{H-}^1\text{H-gCOSY}$  NMR spectrum for oxy-skyllamycin (500 MHz,  $\text{CD}_3\text{OD}$ , 25 °C).

Fig. S13. Expansion 2 (0.5 to 5.5 ppm region) of  $^1\text{H-}^1\text{H-gCOSY}$  NMR spectrum for oxy-skyllamycin (500 MHz,  $\text{CD}_3\text{OD}$ , 25 °C).

Fig. S14.  $^1\text{H-}^{13}\text{C-HSQC}$  NMR spectrum for oxy-skyllamycin (500 MHz,  $\text{CD}_3\text{OD}$ , 25 °C) – blue correlations represent  $\text{CH}_2$  groups, red correlations represent  $\text{CH}$ , or  $\text{CH}_3$  groups. Significant  $^1\text{H-}^{13}\text{C}$  connections are indicated in boxes.

Fig. S15. Expansion 1 (6.3-8.0 ppm/100-145 ppm region) of  $^1\text{H-}^{13}\text{C-HSQC}$  NMR spectrum for oxy-skyllamycin (500 MHz,  $\text{CD}_3\text{OD}$ , 25 °C).

Fig. S16. Expansion 2 (2.7-5.7 ppm/20-80 ppm region) of  $^1\text{H-}^{13}\text{C-HSQC}$  NMR spectrum for oxy-skyllamycin (500 MHz,  $\text{CD}_3\text{OD}$ ).

Fig. S17. Expansion 3 (0.4-2.2 ppm/0-50 ppm region) of  $^1\text{H-}^{13}\text{C-HSQC}$  NMR spectrum for oxy-skyllamycin (500 MHz,  $\text{CD}_3\text{OD}$ , 25 °C).

Fig. S18.  $^1\text{H-}^1\text{H-TOCSY}$  NMR spectrum for oxy-skyllamycin (500 MHz,  $\text{CD}_3\text{OD}$ , 25 °C) – epoxide spin system indicated in the box.

Fig. S19. Expansion 1 (6.3-8.0 ppm region) of  $^1\text{H-}^1\text{H-TOCSY}$  NMR spectrum.

Fig. S20. Expansion 2 (0.4-5.6 ppm region) of  $^1\text{H-}^1\text{H-TOCSY}$  NMR spectrum.

Fig. S21. Chiral epoxides formed during biosynthesis of cinnamoyl chains of CCNPs

Fig. S22. Epoxy-cinnamoyl-threonine made by *Streptomyces* HS-NF-1222A

Fig. S23. Alignment of P450sky2 with Avm43, EpcF and DmlF.

Table S1. Biological activities of cinnamate-containing non-ribosomal peptide natural products.

| CCNP                 | Biological activity                                                                                                                                             | Reference |
|----------------------|-----------------------------------------------------------------------------------------------------------------------------------------------------------------|-----------|
| Skyllamycin          | Inhibit PDGF pathway, antibacterial, biofilm inhibition and dispersal                                                                                           | 13        |
| WS9326A              | Tachykinin receptor agonist, inhibits asparaginyl tRNA synthetase from parasite <i>Brugia malayi</i> , inhibits transcription in <i>Clostridium perfringens</i> | 6         |
| Mohangamide A        | Inhibits <i>Candida albicans</i> isocitrate lyase                                                                                                               | 7         |
| Coprisimides A and B | Inducers of quinone reductase, a phase II detoxification enzyme that protects against cancer                                                                    | 4         |
| Pepticcinnamin E     | Inhibits farnesyltransferase                                                                                                                                    | 2         |
| Atrovimycin          | Antitubercular, antifungal                                                                                                                                      | 1         |
| Atratumycin          | Antitubercular                                                                                                                                                  | 3         |
| Kitacinnamycins      | Activates stimulator of interferon gene (STING) protein                                                                                                         | 20        |
| Nyuzenamides A and B | Antifungal, cytotoxic                                                                                                                                           | 8         |
| Nyuzenamide C        | Anti-angiogenic, induces quinone reductase in murine Hepa 1c1c7 cells                                                                                           | 30        |
|                      |                                                                                                                                                                 |           |

Table S2. Orphan P450s with > 85% sequence identity to P450sky2.

| Microorganism                    | Genome accession number | P450sky2 homologue, % identity | NRPS                                |
|----------------------------------|-------------------------|--------------------------------|-------------------------------------|
| <i>Streptomyces</i> sp SID2888   | WWKB01000082            | 99%                            | Incomplete                          |
| <i>Streptomyces</i> CB01373      | NNBK01000012            | 88%                            | Skyllamycin                         |
| <i>Streptomyces</i> sp 6-11-2    | BJOR01000001            | 88%                            | Skyllamycin                         |
| <i>Streptomyces scopuliridis</i> | NZ_JOEI01000022.1       | 85%                            | Skyllamycin                         |
| <i>Streptomyces</i> CoT10        | NZ_JAIQYX01000027.1     | 88%                            | 10-module NRPS, skyllamycin-related |

Table S3. Comparison between NMR spectral data for synthetic skyllamycin A (11) and isolated oxy-skyllamycin A.

| Residue              | Position          | <sup>1</sup> H-NMR (500 MHz, CD <sub>3</sub> OD, 25 °C)<br>δ <sub>H</sub> ppm (mult., J = Hz) <sup>a</sup> | <sup>13</sup> C-NMR<br>δ <sub>C</sub> ppm<br>{from HSQC} | Synthetic skyllamycin A<br><sup>1</sup> H-NMR (600 MHz, CD <sub>3</sub> OD)<br>δ <sub>H</sub> ppm |
|----------------------|-------------------|------------------------------------------------------------------------------------------------------------|----------------------------------------------------------|---------------------------------------------------------------------------------------------------|
| <b>Thr</b>           | C=O               | -                                                                                                          | -                                                        | -                                                                                                 |
|                      | α-CH              | 5.08-5.12 (m)                                                                                              | 60.5                                                     | 5.08                                                                                              |
|                      | β-CH              | 5.46-5.53 (m)                                                                                              | 68.9                                                     | 5.48                                                                                              |
|                      | CH <sub>3</sub>   | 1.37 (d, J = 6.5 Hz)                                                                                       | 15.9                                                     | 1.35                                                                                              |
| <b>Ala</b>           | C=O               | -                                                                                                          | -                                                        | -                                                                                                 |
|                      | α-CH              | 4.06-4.10 (m)                                                                                              | 51.3                                                     | 4.06                                                                                              |
|                      | CH <sub>3</sub>   | 1.49 (d, J = 7.0 Hz)                                                                                       | 15.5                                                     | 1.48                                                                                              |
| <b>β-Me-Asp</b>      | C=O               | -                                                                                                          | -                                                        | -                                                                                                 |
|                      | α-CH              | 5.15-5.21 (m)                                                                                              | 52.9                                                     | 5.21                                                                                              |
|                      | β-CH              | 3.25-3.32 (m)                                                                                              | 47.8                                                     | 3.26                                                                                              |
|                      | CH <sub>3</sub>   | 1.27 (d(br), J = 5.0 Hz)                                                                                   | 13.1                                                     | 1.30                                                                                              |
|                      | C=O               | -                                                                                                          | -                                                        | -                                                                                                 |
| <b>Gly</b>           | C=O               | -                                                                                                          | -                                                        | -                                                                                                 |
|                      | α-CH <sub>2</sub> | 3.65-3.74 (m)                                                                                              | 46.7                                                     | 3.66/3.74                                                                                         |
| <b>β-OH-Phe</b>      | C=O               | -                                                                                                          | -                                                        | -                                                                                                 |
|                      | β-CH              | 4.56-4.60 (m)                                                                                              | 71.5                                                     | 4.54                                                                                              |
|                      | α-CH              | 4.61-4.66 (m)                                                                                              | 53.9                                                     | 4.63                                                                                              |
|                      | C-1               | -                                                                                                          | -                                                        | -                                                                                                 |
|                      | CH-2/6            | 7.45                                                                                                       | -                                                        | 7.43                                                                                              |
|                      | CH-3/5            | 7.37                                                                                                       | -                                                        | 7.36                                                                                              |
|                      | CH-4              | 7.25                                                                                                       | -                                                        | 7.24                                                                                              |
| <b>Pro</b>           | C=O               | -                                                                                                          | -                                                        | -                                                                                                 |
|                      | α-CH              | 4.32-4.38 (m)                                                                                              | 59.8                                                     | 4.35                                                                                              |
|                      | β-CH <sub>2</sub> | 1.57-1.62 (m)/1.85-1.92 (m)                                                                                | 39.9                                                     | 1.64/1.96                                                                                         |
|                      | γ-CH <sub>2</sub> | 1.25-1.35 (m)/1.72-1.77 (m)                                                                                | 29.0/22.6                                                | 1.37/1.76                                                                                         |
|                      | δ-CH <sub>2</sub> | 3.46-3.51 (m)/4.07-4.13 (m)                                                                                | 42.3                                                     | 3.47/4.14                                                                                         |
| <b>β-OH-O-Me-Tyr</b> | C=O               | -                                                                                                          | -                                                        | -                                                                                                 |
|                      | α-CH              | 4.81-4.85 (m)                                                                                              | 57.8/57.6 <sup>b</sup>                                   | 4.76                                                                                              |
|                      | β-CH              | 4.52 (d, J = 6.0 Hz)                                                                                       | 73.4                                                     | 4.50                                                                                              |
|                      | C-1               | -                                                                                                          | -                                                        | -                                                                                                 |
|                      | CH-2/6            | 6.46-6.54 (m)                                                                                              | 113.0/127.6                                              | 6.71/6.59                                                                                         |
|                      | CH-3/5            | 6.46-6.54 (m)                                                                                              | 127.6/113.0                                              | 6.59/6.71                                                                                         |
|                      | C-4               | -                                                                                                          | -                                                        | -                                                                                                 |
|                      | OCH <sub>3</sub>  | 3.67 (s)                                                                                                   | 54.3                                                     | 3.67                                                                                              |
| <b>D-Trp</b>         | C=O               | -                                                                                                          | -                                                        | -                                                                                                 |
|                      | α-CH              | 4.81-4.85 (m)                                                                                              | 57.6/57.8 <sup>b</sup>                                   | 4.72                                                                                              |
|                      | β-CH <sub>2</sub> | 3.10-3.16 (m)<br>3.37-3.42 (m)                                                                             | 27.8                                                     | 3.16                                                                                              |
|                      | CH-2              | 7.15 (s)                                                                                                   | 123.5                                                    | 7.18                                                                                              |

|                                    |                          |                             |       |           |
|------------------------------------|--------------------------|-----------------------------|-------|-----------|
|                                    | C-3                      | -                           | -     | -         |
|                                    | C-3a                     | -                           | -     | -         |
|                                    | CH-4                     | 7.46-7.49 (m)               | 118.2 | 7.60      |
|                                    | CH-5                     | 6.85 (t(br), $J = 7.5$ Hz)  | 118.8 | 6.94      |
|                                    | CH-6                     | 7.05 (t, $J = 7.5$ Hz)      | 121.0 | 7.07      |
|                                    | CH-7                     | 7.25-7.30 (m)               | -     | 7.30      |
|                                    | C-7a                     | -                           | -     | -         |
| <b><math>\alpha</math>-OH-Gly</b>  | C=O                      | -                           | -     | -         |
|                                    | $\alpha$ -CH             | 5.34-5.38 (m)               | 73.6  | 5.44      |
| <b>D-Leu</b>                       | C=O                      | -                           | -     | -         |
|                                    | $\alpha$ -CH             | 4.28-4.34 (m)               | 55.1  | 4.35      |
|                                    | $\beta$ -CH <sub>2</sub> | 1.57-1.62 (m)/1.80-1.85 (m) | 23.5  | 1.63/1.82 |
|                                    | $\gamma$ -CH             | 1.85-1.89 (m)               | 24.8  | 1.86      |
|                                    | CH <sub>3</sub>          | 0.91 (d, $J = 6.5$ Hz)      | 20.3  | 0.93      |
|                                    | CH <sub>3</sub>          | 1.01 (d, $J = 6.5$ Hz)      | 21.8  | 0.99      |
| <b><math>\beta</math>-OH-D-Leu</b> | C=O                      | -                           | -     | -         |
|                                    | $\alpha$ -CH             | 4.45-4.48 (m)               | 54.8  | 4.46      |
|                                    | $\beta$ -CH              | 3.81 (d, $J = 9.0$ Hz)      | 75.5  | 3.81      |
|                                    | $\gamma$ -CH             | 1.70-1.75 (m)               | 31.1  | 1.72      |
|                                    | CH <sub>3</sub>          | 0.85 (d, $J = 7.0$ Hz)      | 17.6  | 0.85      |
|                                    | CH <sub>3</sub>          | 1.06 (d, $J = 6.5$ Hz)      | 18.2  | 1.04      |
| <b>Cinnamoyl</b>                   | C=O                      | -                           | -     | -         |
|                                    | CH-2                     | 7.30 (d, $J = 15.0$ Hz)     | 123.0 | 7.19      |
|                                    | CH-3                     | 7.81 (d, $J = 15.0$ Hz)     | 136.0 | 7.85      |
|                                    | C-4                      | -                           | -     | -         |
|                                    | CH-5                     | 7.95 (d, $J = 7.5$ Hz)      | 126.6 | 7.90      |
|                                    | CH-6                     | 7.25-7.30 (m)               |       | 7.29      |
|                                    | CH-7                     | 7.25-7.30 (m)               |       | 7.29      |
|                                    | CH-8                     | 7.25-7.30 (m)               |       | 7.15      |
|                                    | C-9                      | -                           | -     | -         |
|                                    | CH-10                    | 3.95 (s(br))                | 55.5  | 6.39      |
|                                    | CH-11                    | 2.76-2.79 (m)               | 54.6  | 5.77      |
|                                    | CH <sub>3</sub> -12      | 0.49 (m(br))                | 11.9  | 1.51      |

<sup>a</sup>mult. = signal multiplicity (m = multiplet, s = singlet (br = broad), d = doublet, t = triplet,  $J$  = coupling constant, value given in Hertz); <sup>b</sup>Signals coincident and under HDO signal in <sup>1</sup>H-NMR spectrum.

Table S4 P450Sky2 crystallographic data collection and refinement statistics

| Parameter                      | Value                          |
|--------------------------------|--------------------------------|
| PDB entry                      | 8FZ8                           |
| Wavelength (Å)                 | 0.97946                        |
| Resolution range (Å)           | 35.84 - 1.43 (1.481 - 1.43)    |
| Space group                    | P 1 2 <sub>1</sub> 1           |
| Unit cell (Å and degrees)      | 35.98 97.8501 52.5 90 95.12 90 |
| Total reflections              | 253782 (25702)                 |
| Unique reflections             | 64328 (6466)                   |
| Multiplicity                   | 3.9 (4.0)                      |
| Completeness (%)               | 96.44 (97.29)                  |
| Mean I/sigma(I)                | 11.94 (2.90)                   |
| Wilson B-factor                | 15.55                          |
| R-merge                        | 0.05438 (0.366)                |
| R-meas                         | 0.06255 (0.4233)               |
| R-pim                          | 0.0303 (0.209)                 |
| CC1/2                          | 0.998 (0.896)                  |
| CC*                            | 1 (0.972)                      |
| Reflections used in refinement | 64284 (6465)                   |
| Reflections used for R-free    | 2000 (201)                     |
| R-work                         | 0.1750 (0.2198)                |
| R-free                         | 0.1889 (0.2505)                |
| CC(work)                       | 0.966 (0.900)                  |
| CC(free)                       | 0.970 (0.855)                  |
| Number of non-hydrogen atoms   | 3503                           |
| macromolecules                 | 3162                           |
| ligands                        | 54                             |
| solvent                        | 287                            |
| Protein residues               | 392                            |
| RMS(bonds)                     | 0.006                          |
| RMS(angles)                    | 0.93                           |
| Ramachandran favored (%)       | 96.38                          |
| Ramachandran allowed (%)       | 2.84                           |
| Ramachandran outliers (%)      | 0.78                           |
| Rotamer outliers (%)           | 1.45                           |
| Clashscore                     | 10.19                          |
| Average B-factor               | 21.88                          |
| macromolecules                 | 21.31                          |
| ligands                        | 16.53                          |
| solvent                        | 29.16                          |

Values in ( ) are for statistics in the highest resolution shell. Statistics generated using by the "Table 1" utility in Phenix.

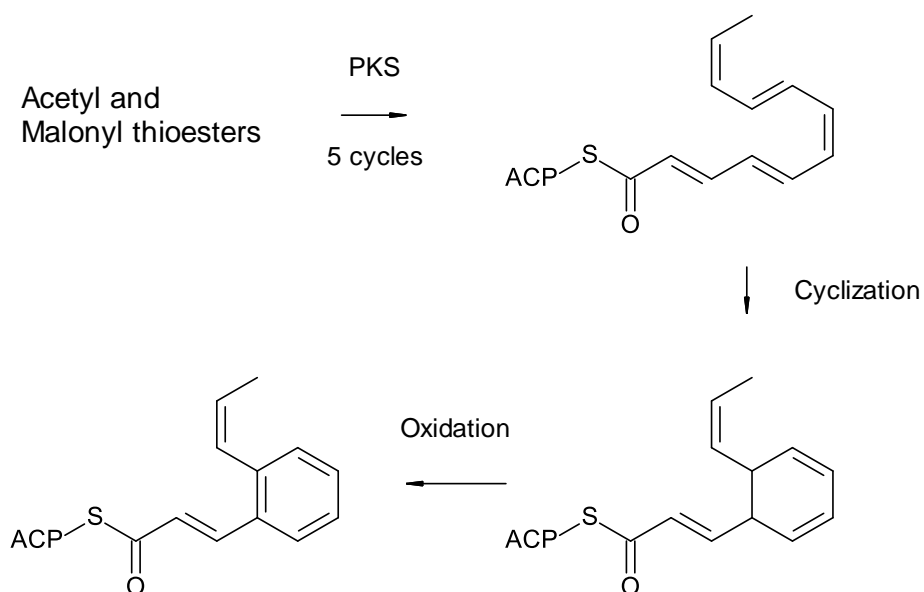

Fig. S1. Biosynthesis of the propenyl-cinnamoyl chain of skyllamycin A. An all-trans polyene polyketide intermediate undergoes trans-cis isomerization of double bonds, followed by electrocyclization and oxidation to give the aromatic ring. The cyclase involved in skyllamycin biosynthesis has not been identified but at least two classes of electrocyclase have been identified in biosynthetic pathways to other cinnamoyl-containing natural products (20).

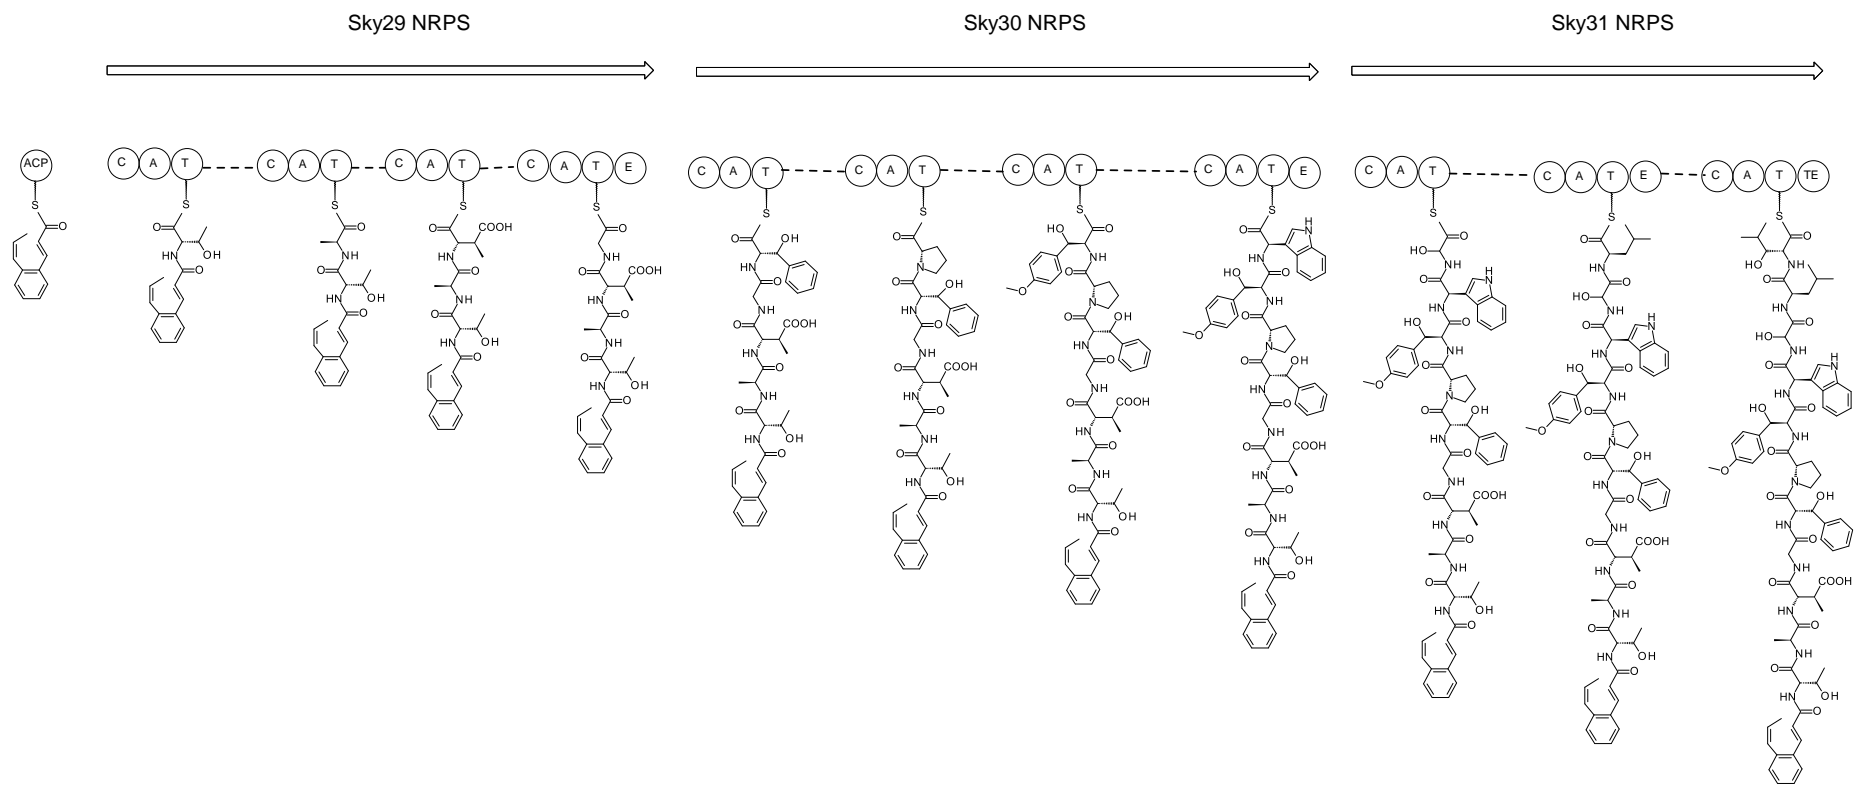

Fig. S2 Lipopeptide intermediates synthesized by the skyllamycin A NRPS.



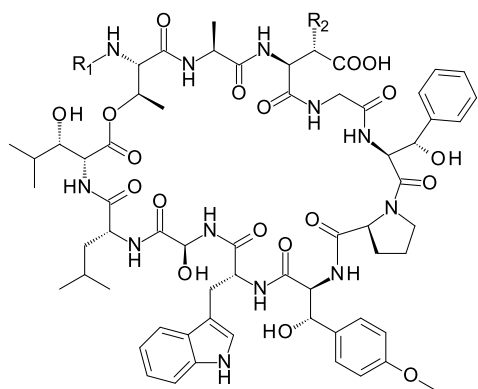

Skyllamycin A  $R_2 = \text{CH}_3$ ,  $R_1 =$

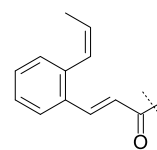

Skyllamycin B  $R_2 = \text{H}$ ,  $R_1 =$

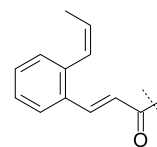

Skyllamycin C  $R_2 = \text{H}$ ,  $R_1 =$

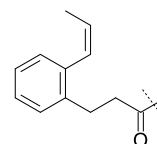

Skyllamycin D  $R_2 = \text{CH}_3$ ,  $R_1 =$

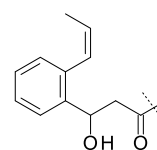

Skyllamycin E  $R_2 = \text{CH}_3$ ,  $R_1 =$

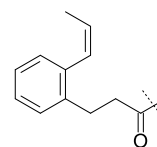

Fig. S3 Structures of skyllamycins A to E (10, 13, 14, 15).

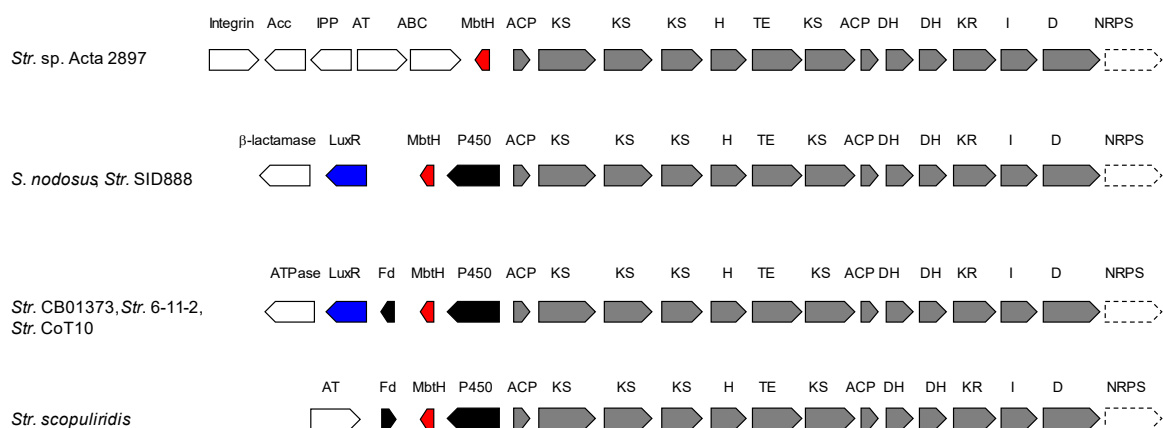

Fig. S4 Organization of propenyl-cinnamoyl biosynthetic genes in different skyllamycin BGCs (See also Table S2). *Streptomyces* sp Acta 2897 produces skyllamycins A and B and does not have the gene for P450Sky2 (black box). Abbreviations are as follows: ACP, acyl carrier protein; KS, ketosynthase; H, hydrolase; TE, thioesterase; DH, dehydratase; KR, ketoreductase; I, isomerase; D, dehydrogenase; Fd, ferredoxin. MbtH proteins stimulate the A domains of non-ribosomal peptide synthetases. The product of the LuxR gene (blue) activates the silent skyllamycin cluster in *S. nodosus*.

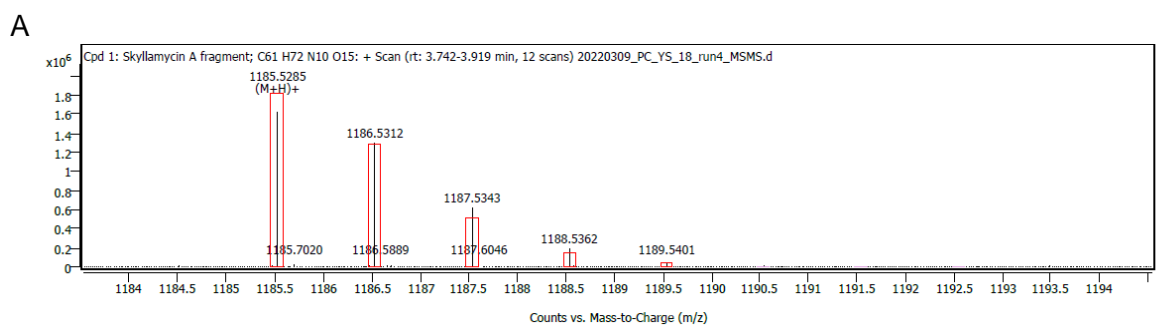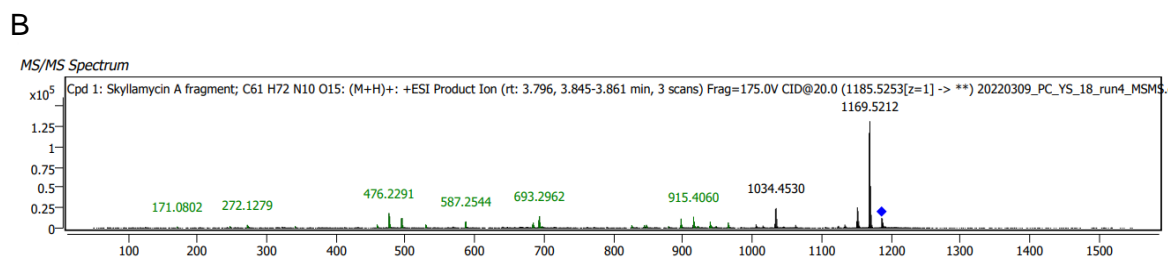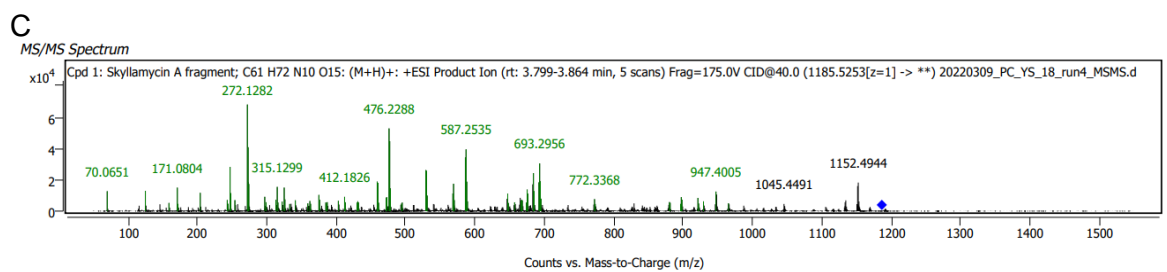

Fig. S5 Mass spectrometry of skyllamycin A fragment generated by ammonia cleavage of the intact cyclodepsipeptide. (A) Detection of acyl-octapeptide fragment,  $[M + H]^+ = 1185.5285$ . (B) MS-MS spectrum obtained with collision energy of 20 eV. (C) MS-MS spectrum obtained with collision energy of 40 eV.

A

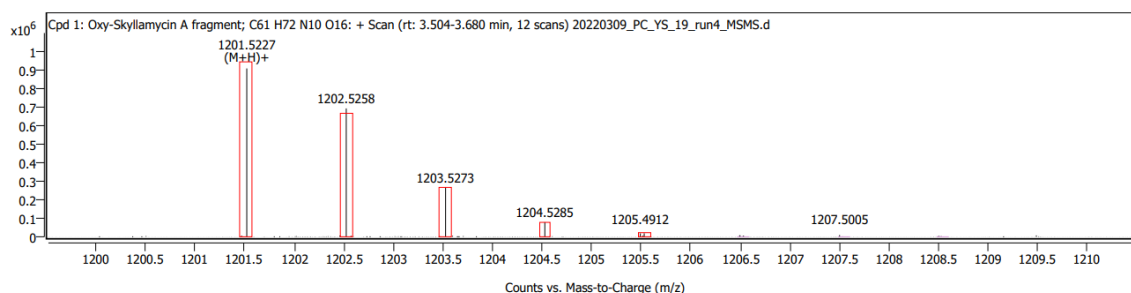

B

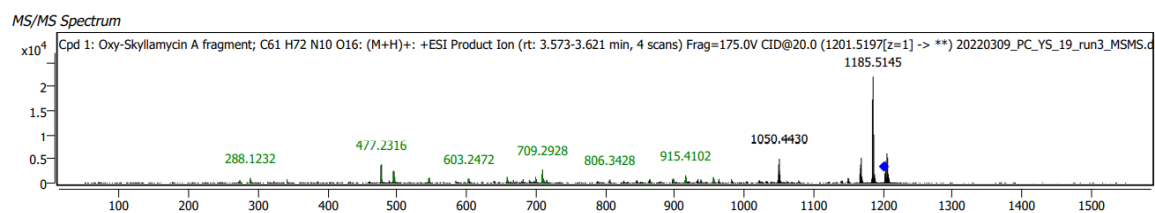

C

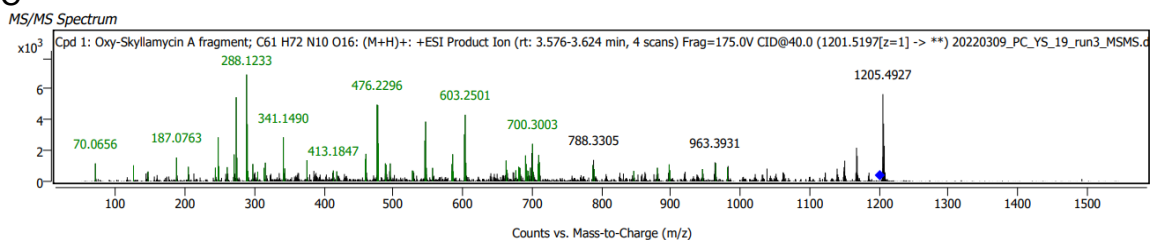

Fig. S6 Mass spectrometry of oxy-skyllamycin A fragment generated by ammonia cleavage of the intact cyclodepsipeptide. (A) Detection of acyl-octapeptide fragment,  $[M + H]^+ = 1201.5227$ . (B) MS-MS spectrum obtained with collision energy of 20 eV. (C) MS-MS spectrum obtained with collision energy of 40 eV.

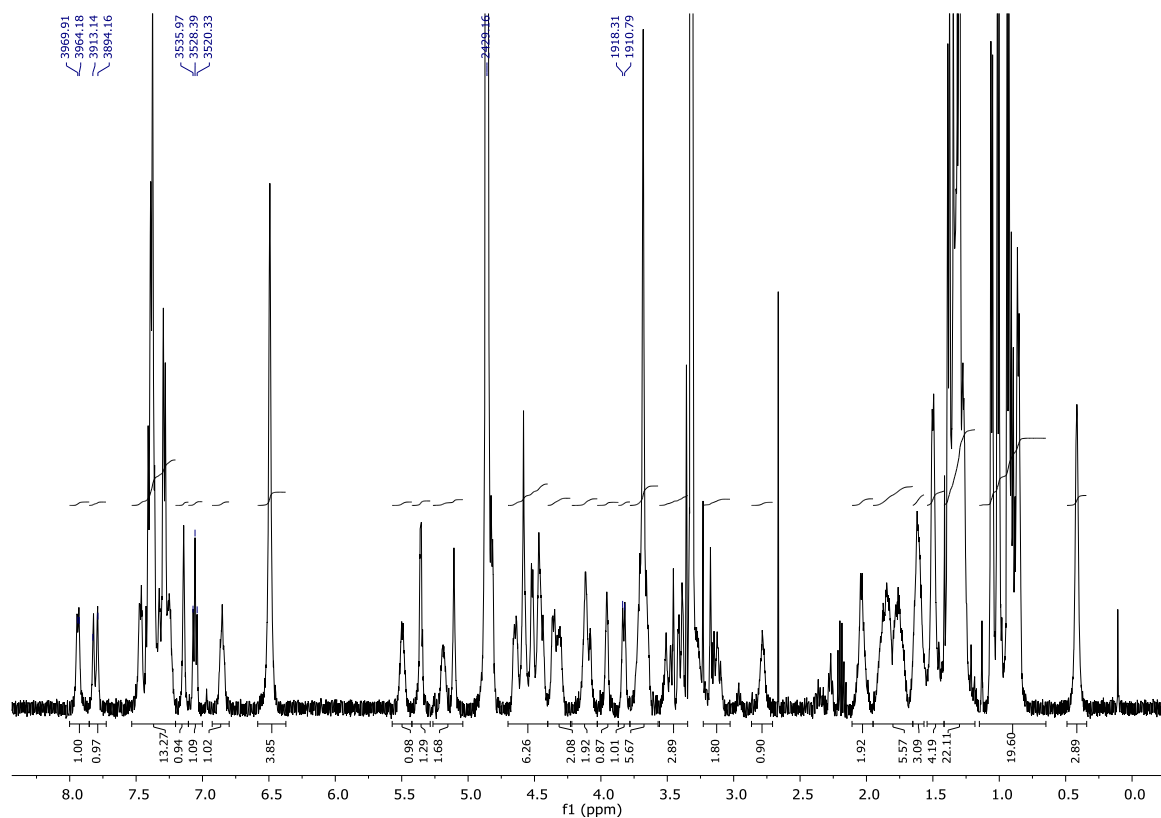

|    | Parameter              | Value                  |
|----|------------------------|------------------------|
| 1  | Title                  | YS1_PROTON_20220512_01 |
| 2  | Solvent                | CD <sub>3</sub> OD     |
| 3  | Temperature            | 25.0 °C                |
| 4  | Experiment             | 1D                     |
| 5  | Number of Scans        | 128                    |
| 6  | Relaxation Delay       | 2.0000 sec             |
| 7  | Acquisition Time       | 3.6000 sec             |
| 8  | Spectrometer Frequency | 500.03 MHz             |
| 9  | Acquired Size          | 28846                  |
| 10 | Spectral Size          | 65536                  |

Fig. S7 <sup>1</sup>H-NMR spectrum of oxy-skyllamycin (500 MHz, CD<sub>3</sub>OD, 25 °C).

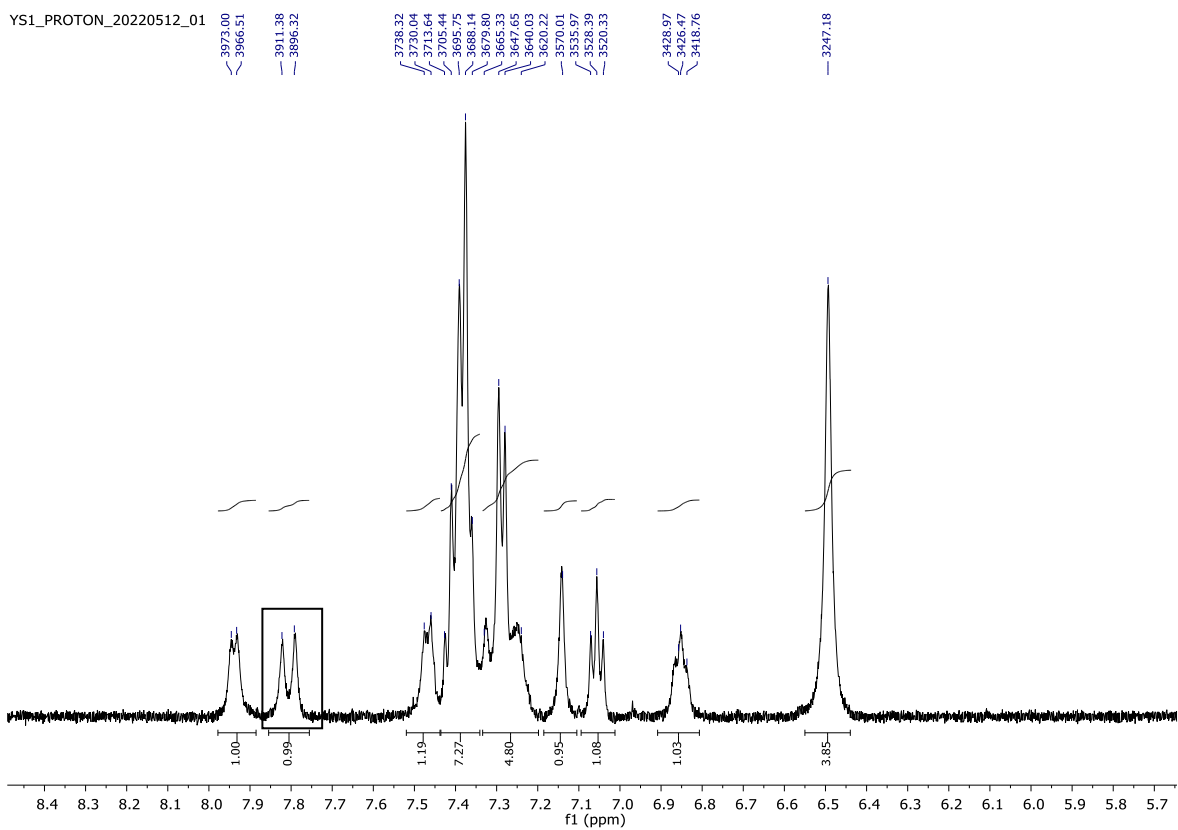

Fig. S8 Expansion 1 (5.7 to 8.4 ppm region) of the  $^1\text{H}$ -NMR spectrum of oxy-skyllamycin (500 MHz,  $\text{CD}_3\text{OD}$ , 25  $^\circ\text{C}$ ). The cinnamoyl  $\beta$ -CH is in the box.

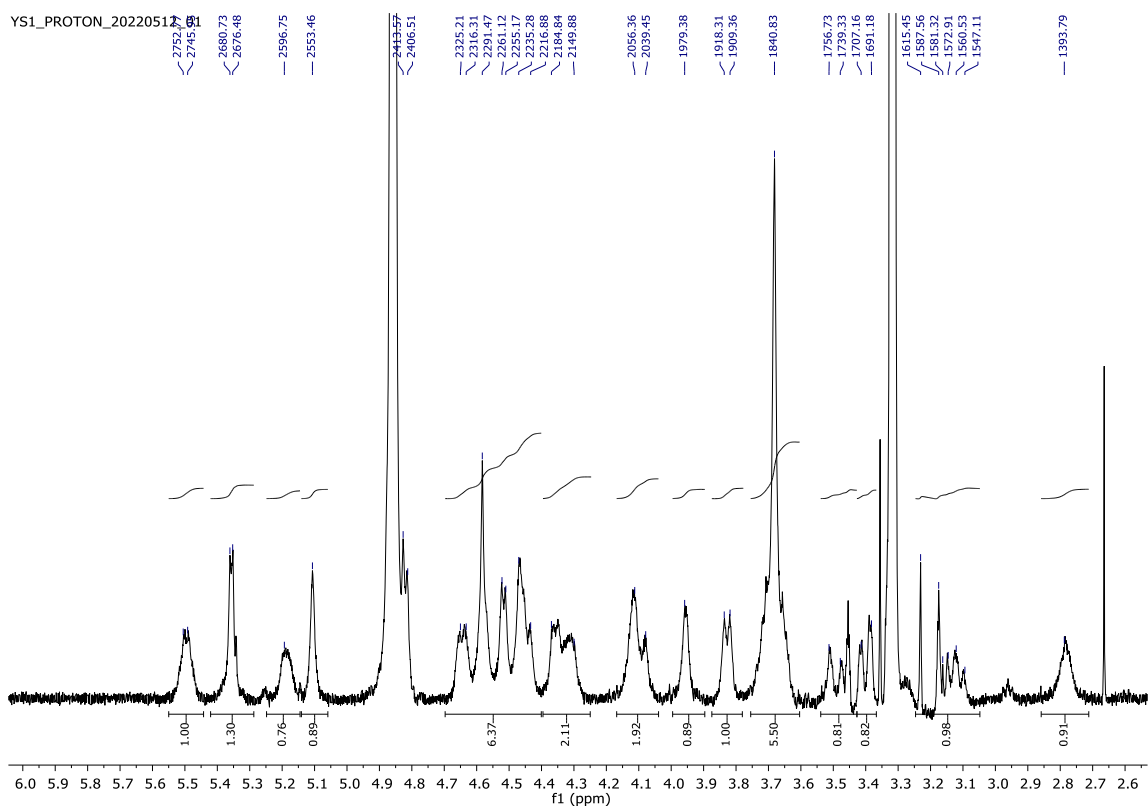

Fig. S9 Expansion 2 (2.6 to 6.0 ppm region) of the  $^1\text{H}$ -NMR spectrum of oxy-skyllamycin (500 MHz,  $\text{CD}_3\text{OD}$ , 25  $^\circ\text{C}$ ).

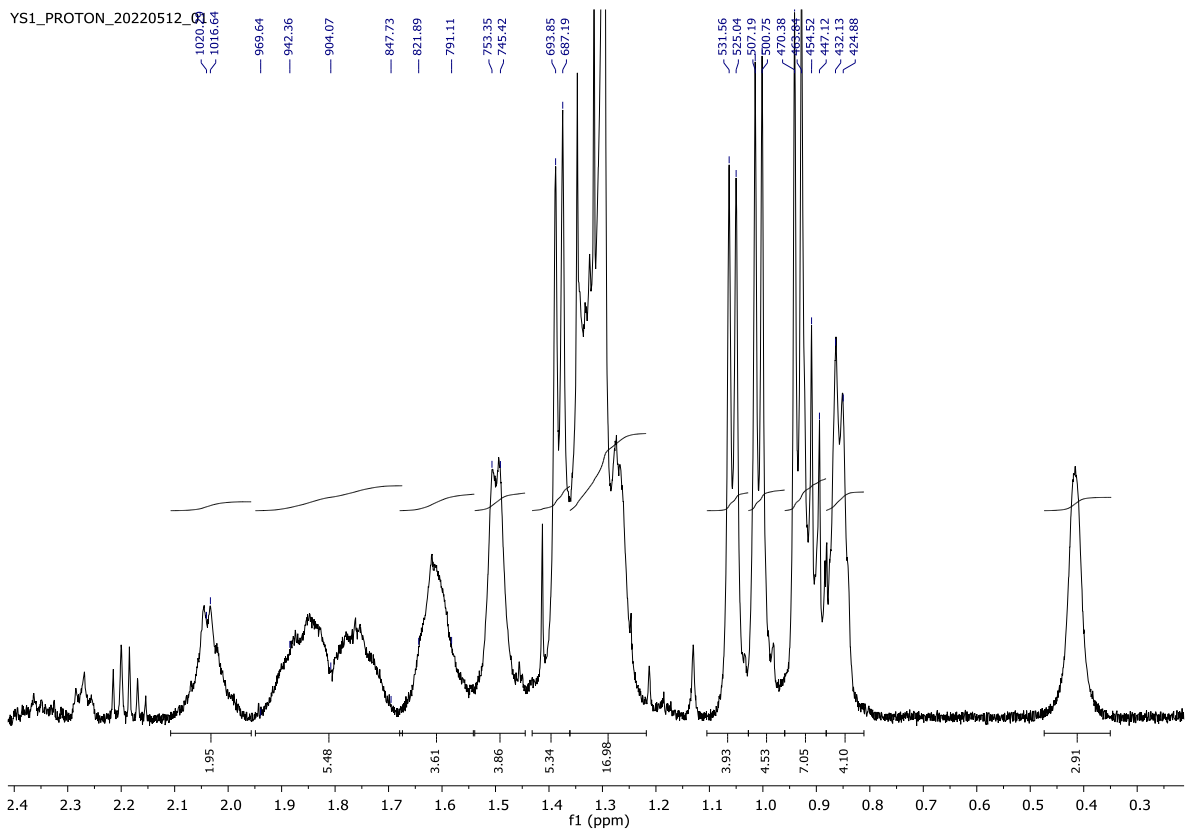

Fig. S10 Expansion 3 (0.3 to 2.4 ppm region) of the  $^1\text{H}$ -NMR spectrum of oxy-skyllamycin (500 MHz,  $\text{CD}_3\text{OD}$ , 25  $^\circ\text{C}$ ).

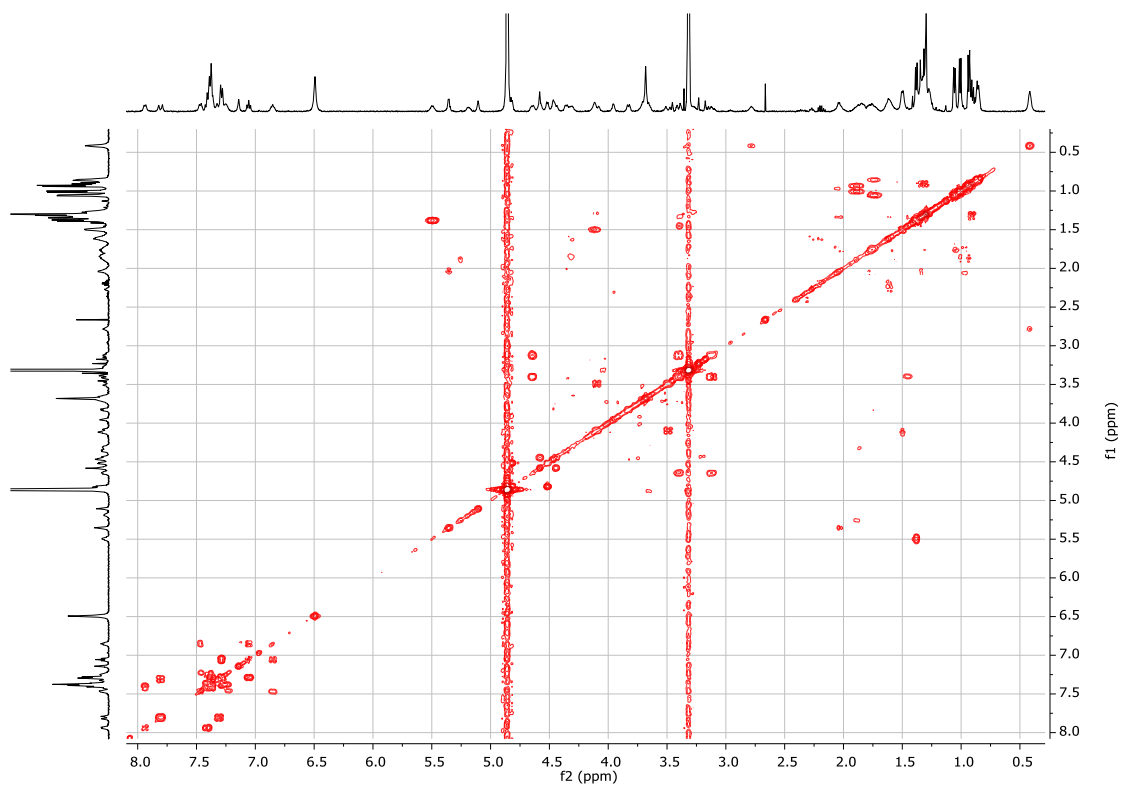

|    | Parameter              | Value                    |
|----|------------------------|--------------------------|
| 1  | Title                  | YS1_gCOSY_20220512_01    |
| 2  | Solvent                | CD <sub>3</sub> OD       |
| 3  | Temperature            | 25.0 °C                  |
| 4  | Experiment             | COSY                     |
| 5  | Number of Scans        | 16                       |
| 6  | Relaxation Delay       | 1.0000 sec               |
| 7  | Acquisition Time       | 0.1500 sec               |
| 8  | Spectrometer Frequency | (500.03 MHz, 500.03 MHz) |
| 9  | Acquired Size          | (597, 400)               |
| 10 | Spectral Size          | (1024, 1024)             |

Fig. S11 <sup>1</sup>H-<sup>1</sup>H-gCOSY NMR spectrum for oxy-skyllamycin (500 MHz, CD<sub>3</sub>OD, 25 °C).





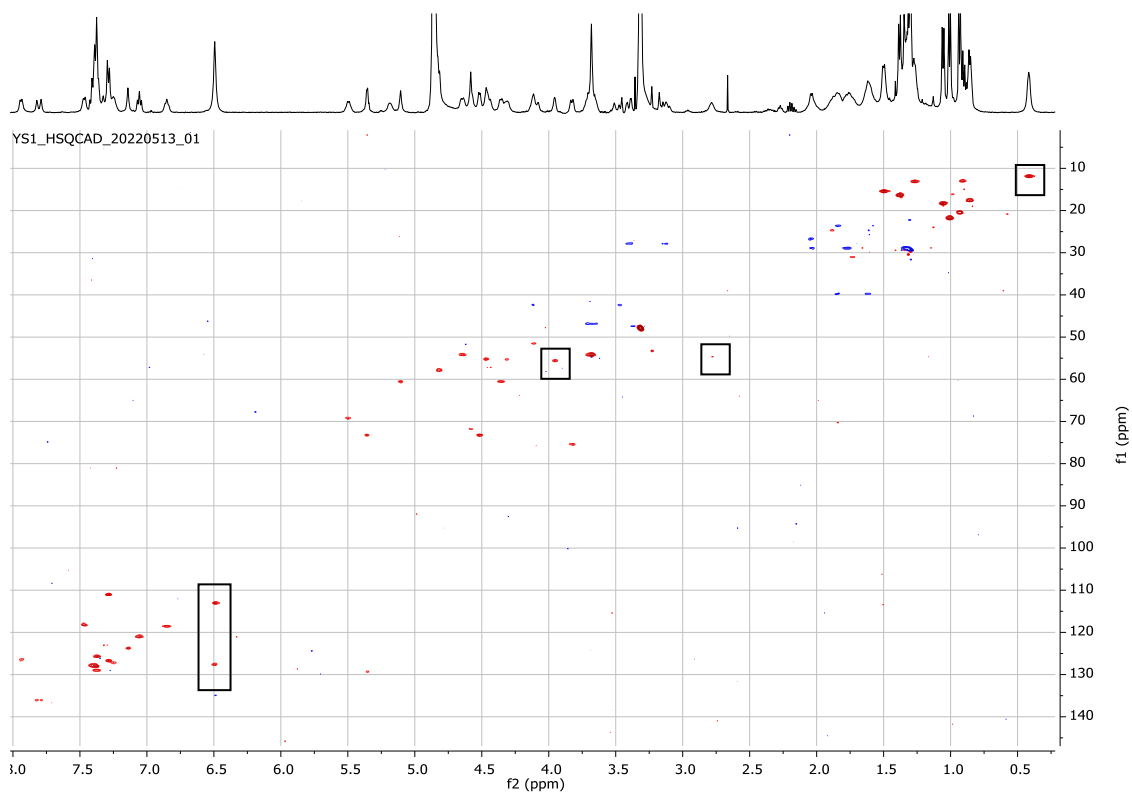

|    | Parameter              | Value                    |
|----|------------------------|--------------------------|
| 1  | Title                  | YS1_HSQCAD_20220513_01   |
| 2  | Solvent                | CD <sub>3</sub> OD       |
| 3  | Temperature            | 25.0 °C                  |
| 4  | Experiment             | HSQC-EDITED              |
| 5  | Number of Scans        | 32                       |
| 6  | Relaxation Delay       | 1.0000 sec               |
| 7  | Acquisition Time       | 0.1500 sec               |
| 8  | Spectrometer Frequency | (500.03 MHz, 125.74 MHz) |
| 9  | Acquired Size          | (597, 400)               |
| 10 | Spectral Size          | (1024, 1024)             |

Fig. S14 <sup>1</sup>H-<sup>13</sup>C-HSQC NMR spectrum for oxy-skyllamycin (500 MHz, CD<sub>3</sub>OD, 25 °C) – blue correlations represent CH<sub>2</sub> groups, red correlations represent CH, or CH<sub>3</sub> groups. Significant <sup>1</sup>H-<sup>13</sup>C connections are indicated in boxes.

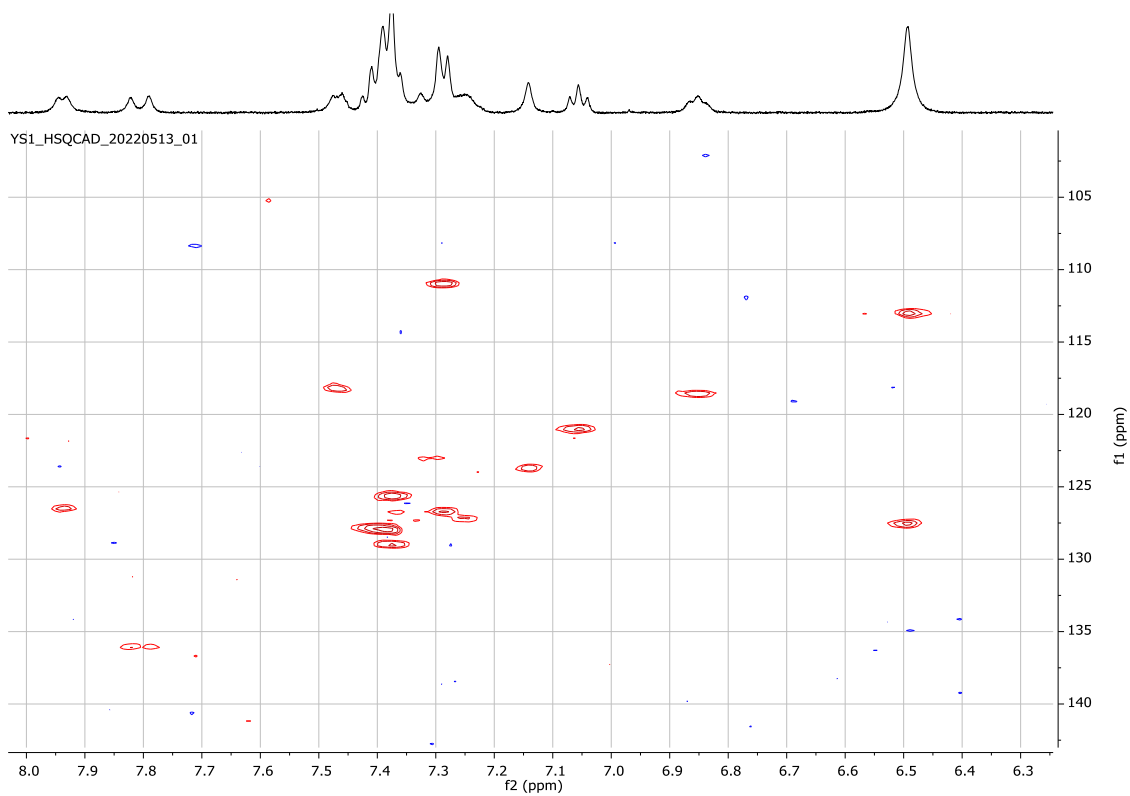

Fig. S15 Expansion 1 (6.3-8.0 ppm/100-145 ppm region) of  $^1\text{H}$ - $^{13}\text{C}$ -HSQC NMR spectrum for oxy-skyllamycin (500 MHz,  $\text{CD}_3\text{OD}$ , 25 °C).

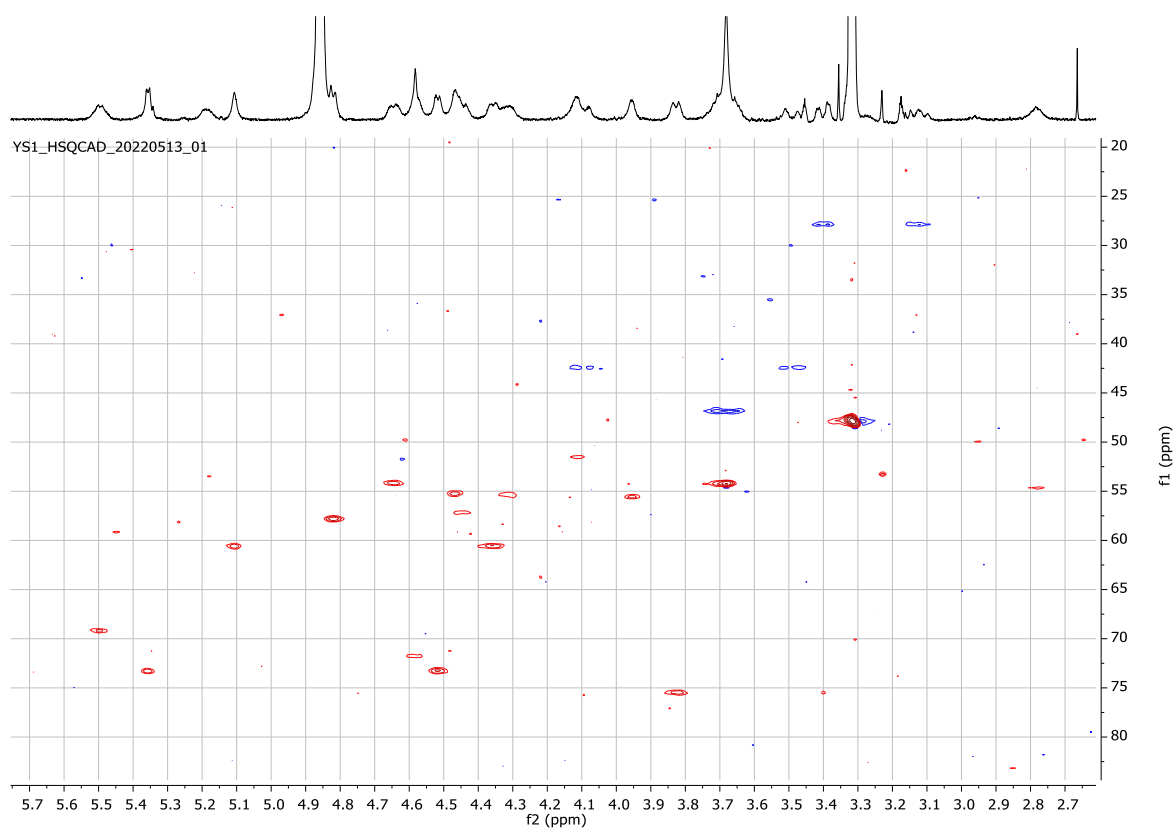

Fig. S16 Expansion 2 (2.7-5.7 ppm/20-80 ppm region) of  $^1\text{H}$ - $^{13}\text{C}$ -HSQC NMR spectrum for oxy-skyllamycin (500 MHz,  $\text{CD}_3\text{OD}$ ).

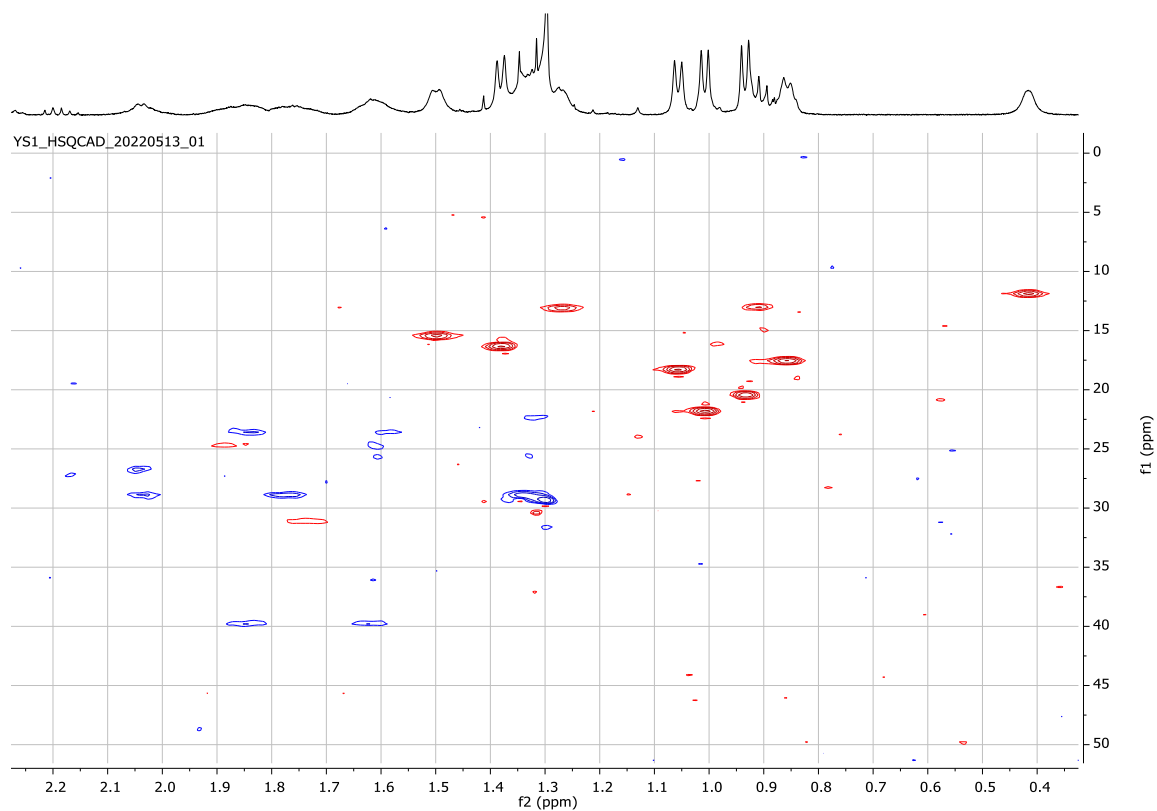

Fig. S17 Expansion 3 (0.4-2.2 ppm/0-50 ppm region) of  $^1\text{H}$ - $^{13}\text{C}$ -HSQC NMR spectrum for oxy-skyllamycin (500 MHz,  $\text{CD}_3\text{OD}$ , 25  $^\circ\text{C}$ ).

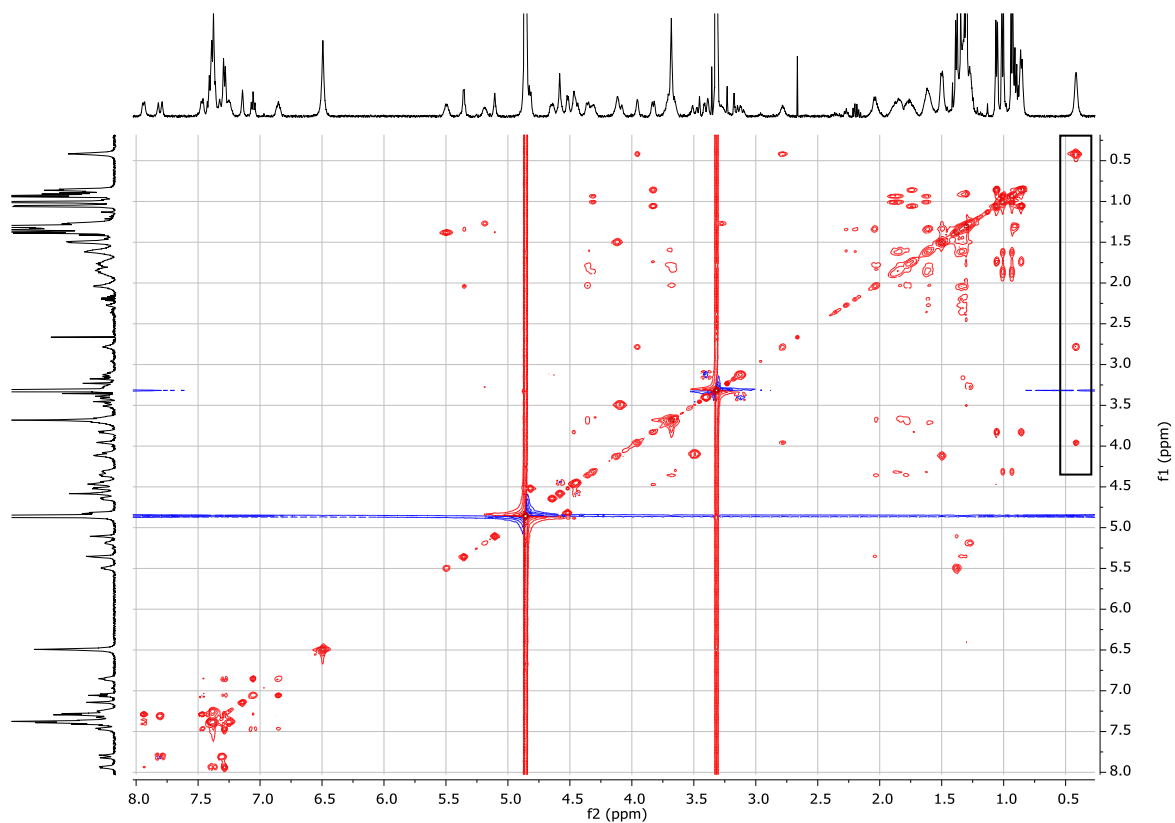

|    | Parameter              | Value                 |
|----|------------------------|-----------------------|
| 1  | Title                  | YS1_TOCSY_20220512_01 |
| 2  | Solvent                | CD <sub>3</sub> OD    |
| 3  | Temperature            | 25.0 °C               |
| 4  | Experiment             | TOCSY                 |
| 5  | Number of Scans        | 16                    |
| 6  | Relaxation Delay       | 1.0000 sec            |
| 7  | Acquisition Time       | 0.1500 sec            |
| 8  | Spectrometer Frequency | (500.03, 500.03)      |
| 9  | Acquired Size          | (597, 400)            |
| 10 | Spectral Size          | (1024, 1024)          |

Fig. S18 <sup>1</sup>H-<sup>1</sup>H-TOCSY NMR spectrum for oxy-skyllamycin (500 MHz, CD<sub>3</sub>OD, 25 °C) – epoxide spin system indicated in the box.

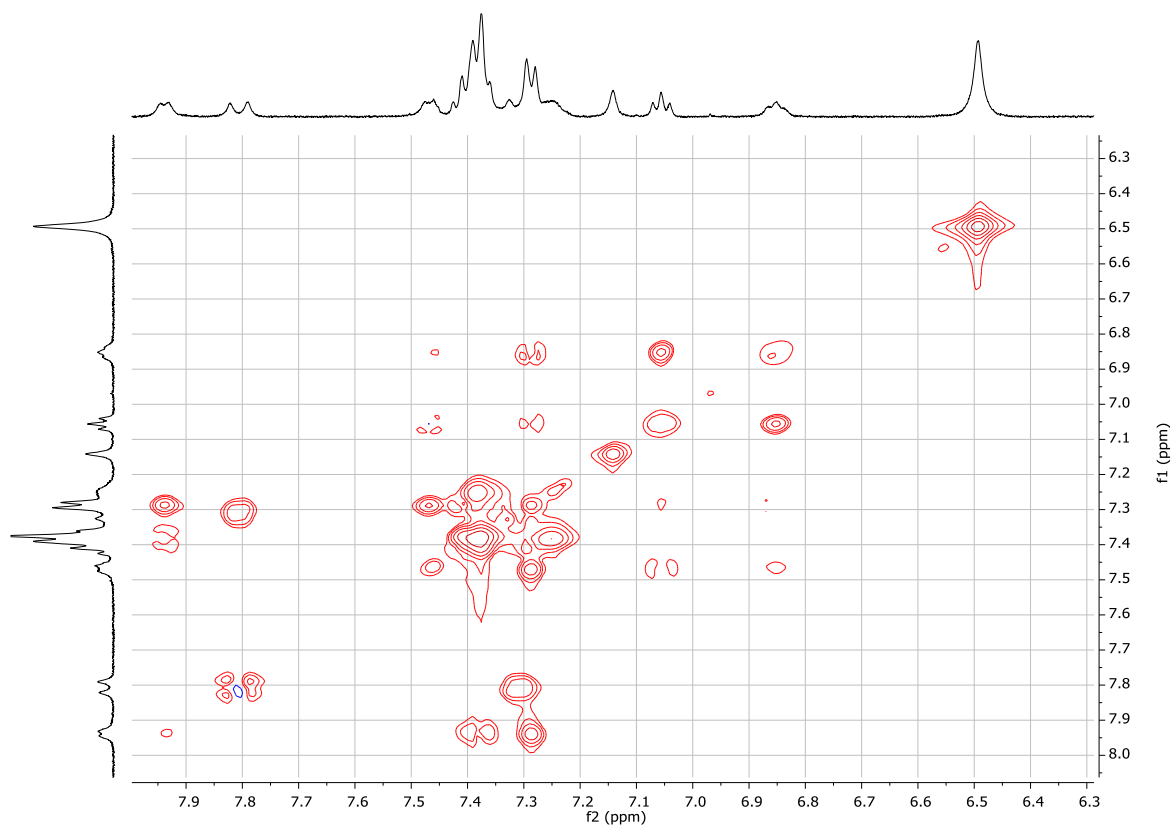

Fig. S19 Expansion 1 (6.3-8.0 ppm region) of  $^1\text{H}$ - $^1\text{H}$ -TOCSY NMR spectrum.

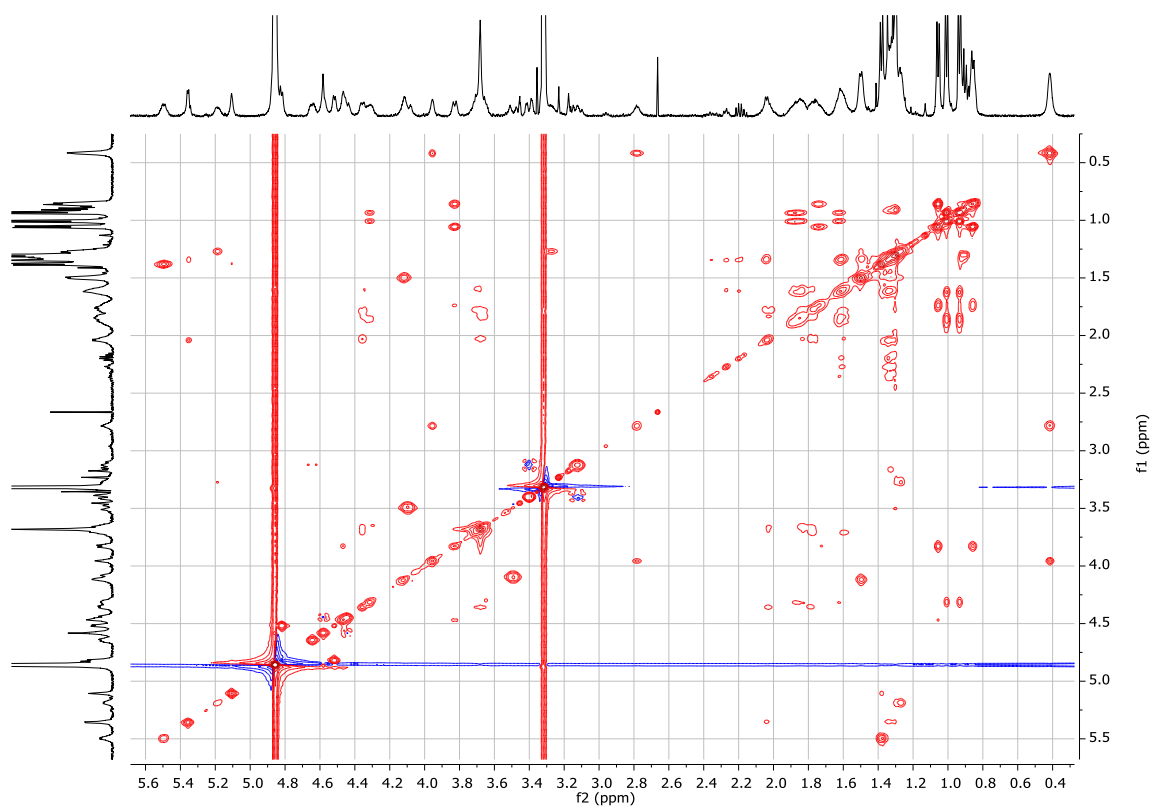

Fig. S20 Expansion 2 (0.4-5.6 ppm region) of  $^1\text{H}$ - $^1\text{H}$ -TOCSY NMR spectrum.

A

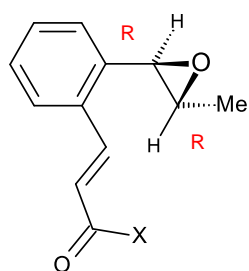

Nyuzenamide C  
*trans* epoxide  
DmlF P450

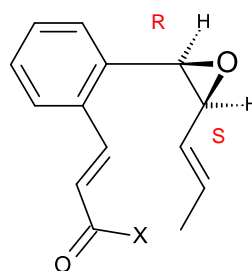

Atrovimycin  
*cis* epoxide  
Avm43 P450

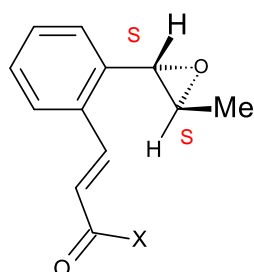

Epoxinnamide  
*trans* epoxide  
EpcF P450

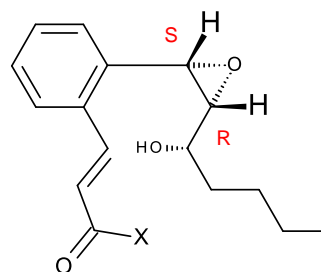

NC1  
*cis* epoxide  
Unknown P450

B

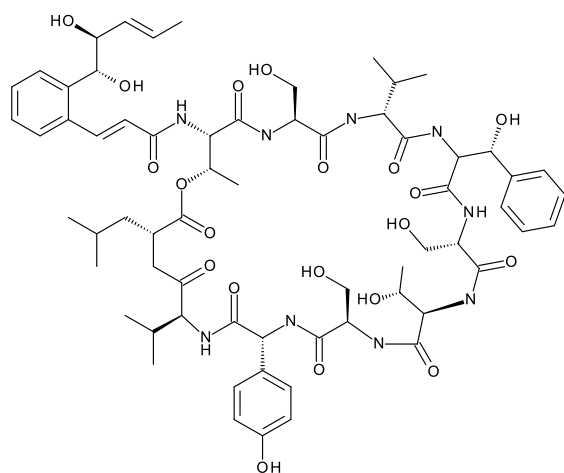

Atrovimycin

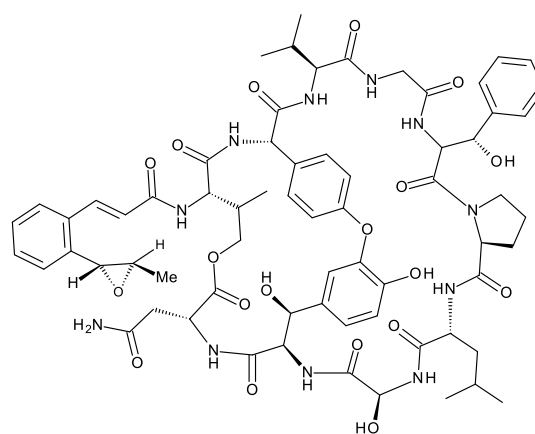

Nyuzenamide C

Fig. S21 A. Chiral epoxides formed during biosynthesis of cinnamoyl chains of CCNPs. X represents the remainder of the peptide macrocycle. The reported structures of nyuzenamide C, the epoxide-containing atrovimycin intermediate, epoxinnamide and NC1 suggest that the epoxide-forming P450s give all four possible stereochemical outcomes. B. Complete structures of atrovimycin and nyuzenamide C. The epoxide in the atrovimycin cinnamate is hydrolyzed in the final peptide.

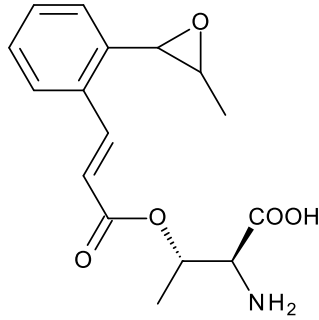

Fig. S22 Epoxy-cinnamoyl-threonine made by *Streptomyces* HS-NF-1222A

|          |                                                                            |     |
|----------|----------------------------------------------------------------------------|-----|
| Avm43    | MRGENTMEQRKISKYWMLTDDFTQNPYPVLERVREEQPVCELSLPDGGRAWVVRHEDAK                | 60  |
| P450Sky2 | -----MAAGGALSKYWMSDEYTONPYPPIFSTLRSEQPVTMVQTPD GARAWVITRHEDVR              | 55  |
| DmlF     | -----MTHGTLSRYWMSDEYTDQPYPFLLAQLREEQPVCRVETPDGVRWVVSRYDDVR                 | 55  |
| EpcF     | -----MTNTGTLSRYWMSDEYTDQPYPFLLAQLRAEQPVCRVETPDGVRWVVSRYDDVR                | 55  |
|          | :*:*:*:*:*:*:*:*:*:*:*:*:*:*:*:*:*:*:*:*:*:*:*:*:*:*:*:*:*:*:*:*:*:*:*:    |     |
| Avm43    | AALSDPRLSRDI NVHFDLVSRLTGTTLTPPEHANHLANLEPPRHTPLRKAISSAFTPRR               | 120 |
| P450Sky2 | NALADPRLSRDI GNLYQALGRQIGKELKPTDEITHHLANS DPPRHTRLRKALVFAFTP KR            | 115 |
| DmlF     | DALSDPRLGRDI GKLYAALGRQLGQDIKPADEISNHLANS DPPRHTRLRKALTFAFP KR             | 115 |
| EpcF     | DALSDPRLGRDI GKLYAALGKQLGQEI KPADEISNHLANS DPPRHTRLRKALTFAFP KR            | 115 |
|          | **:*:*:*:*:*:*:*:*:*:*:*:*:*:*:*:*:*:*:*:*:*:*:*:*:*:*:*:*:*:*:*:*:*:*:    |     |
| Avm43    | ADALRPQIETVADELLDRMAGAGGADLIAAYADPLPVIV IATLMGVPAAAWPDFLWRSTQ              | 180 |
| P450Sky2 | VANMRPRLEQVVEGLLDELA AQHQPDLLEGLAEPLPI IA IAQLLGVPDSDWRQFKIWSNT            | 175 |
| DmlF     | VRGLRDGWGKVVDDLLDEMVRTGNRDLVSGLNEPLPI IT IAQLMGVPD TDWPRFLVWTNT            | 175 |
| EpcF     | VRGLRDGWGKVVDDLLDEMVRTGNRDLVSGLNEPLPI IT IAQLMGVPD ADWPRFLVWTNT            | 175 |
|          | . :* * : * * : * * : * * : * * : * * : * * : * * : * * : * * : * * : * * : |     |
| Avm43    | LRAVQATDPAA--DGTVKELSSYMSALIAEKEREPGDDLISALIHADPDRRLTGTEILST               | 238 |
| P450Sky2 | MRSTDAADPTGLAEHTRELSAYMADLIAEKERHPTDDLISAMVHAEGDKQLTPKEILST                | 235 |
| DmlF     | LRRVDASDPTGIIAEHTRQLSDYLKALIAAKQRDPQDDLISALVHADEDRRLTAAEALST               | 235 |
| EpcF     | LRRVDASDPTGIIAEHTRQLSDYLKALIAATKQRTPPQDDLISALVHADEDKRLTAAEALST             | 235 |
|          | :* :*:*:*:*:*:*:*:*:*:*:*:*:*:*:*:*:*:*:*:*:*:*:*:*:*:*:*:*:*:*:*:*:*:     |     |
| Avm43    | SFALMTGGNDTTASLLGGVLHALLTHPGERAELLAAPGRWVAEMDELIRYVSPITNTLQR               | 298 |
| P450Sky2 | AFALMTGGNETTTALVTCGFAALLTHPEQAKRLKADLDRLPQVDELIRFSSPMLYTLQR                | 295 |
| DmlF     | AFALMTGGNDTTTSLNLSFAALLTHTGEADKIRADWSLLPNAVEELLRYTSPILNSLQR                | 295 |
| EpcF     | AFALMTGGNDTTTSLNLSFAALLTHTGEADKIRADWSLLPNAVEELLRFTNPLNSLQR                 | 295 |
|          | :*****:*:*:*:*:*:*:*:*:*:*:*:*:*:*:*:*:*:*:*:*:*:*:*:*:*:*:*:*:*:*:        |     |
| Avm43    | VTLEPVEIGGVTI PADEVV IISVISTNRDRCPFERPDEL DLKRPKPAHLSFGHGIHYCS             | 358 |
| P450Sky2 | LTLEDVEIAGTTI PAGEI LMLSPASANHDPEALPDRPDEL DIDRPRVHLTFGHGIHYCI             | 355 |
| DmlF     | VTLEPVELCGVKI PKDEI I IISLAGANHDPHAFDRPAELDITRPRPAHMSFGHGIHYCL             | 355 |
| EpcF     | VTLEPVELCGVKI PKDEI I IISLAGANHDPHAFADRAAELDITRPKPAHVSFGYGIHYCL            | 355 |
|          | :*** ** : * ..** .*:~::~* .:~::~* : : * ***: **:*.*:~::~:*****             |     |
| Avm43    | GAHLAKLMTEVAVRRFFERFPDARLAVDPSALRHTQSMVVRPWESLPVWV*                        | 408 |
| P450Sky2 | GSHLARAQAEISIRRVLERFPDVR LAVHPSELRYR PAL LARAPVALPVRL-                     | 405 |
| DmlF     | GSHMSKALTELAIRRVFERFPDIRLAVHPSEVRYR PGLMVRP MIDLPVRF-                      | 405 |
| EpcF     | GSHMSKALTELAIRRVYERFPGIRLAVHPSEVRYR PGLMVRP MIDLPVRF-                      | 405 |
|          | *:*::~: :~::~:* . ***** .*****:** :~::~* :~::~* ***                        |     |

Fig. S23 Alignment of P450Sky2 with Avm43, DmlF and EpcF epoxidases. P450Sky2 shows 63% sequence identity with EpcF and DmlF and 53% sequence identity with Avm43 P450. Active site residues identified from the P450Sky2 structure are coloured red. All are conserved or conservatively substituted in the other epoxidases except Tyr-291.
